# Supplementary material for: Gata6+ resident peritoneal macrophages promote the growth of liver metastasis
Source: PubMed Central journal article supplement (PMC9338095; doi:10.1038/s41467-022-32080-y), 2022-07-29
Supplement: 41467_2022_32080_MOESM1_ESM.pdf [file 41467_2022_32080_MOESM1_ESM.pdf]

## **SUPPLEMENTARY INFORMATION**

**A source of Gata6<sup>+</sup> resident peritoneal macrophages promote the growth of liver  
metastasis**

Mokarram Hossain<sup>1,3#</sup>, Raymond Shim<sup>1,3#</sup>, Woo-Yong Lee<sup>3</sup>, Arlene H. Sharpe<sup>4,5,6</sup>, Paul  
Kubes<sup>1,2,3,\*</sup>

<sup>1</sup>Department of Physiology and Pharmacology, <sup>2</sup>Microbiology and Immunology, <sup>3</sup>Snyder  
Institute for Chronic Diseases, University of Calgary, 3330 Hospital Drive NW, Calgary,  
Alberta, T2N 4N1.

<sup>4</sup>Department of Immunology, Blavatnik Institute, Harvard Medical School, Harvard Medical  
School and Brigham and Women's Hospital, Boston, MA 02115, USA.

<sup>5</sup>Broad Institute of MIT and Harvard, Cambridge, MA 02142, USA.

<sup>6</sup>Department of Pathology, Brigham and Women's Hospital, Boston, MA 02115, USA.

\*Correspondence: [pkubes@ucalgary.ca](mailto:pkubes@ucalgary.ca)

# These authors contributed equally

## Supplementary figures

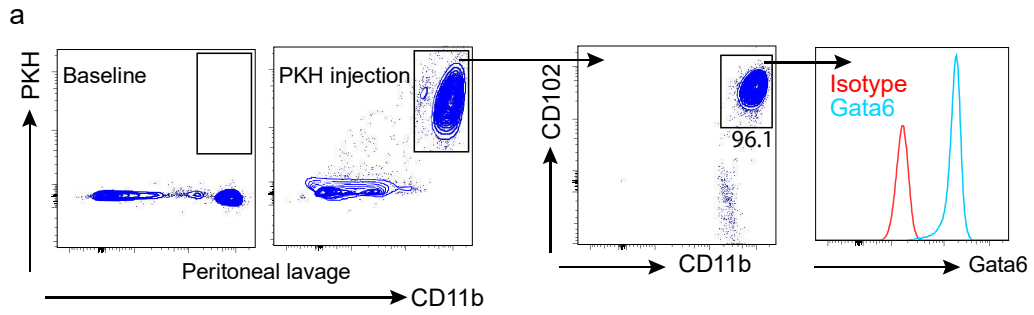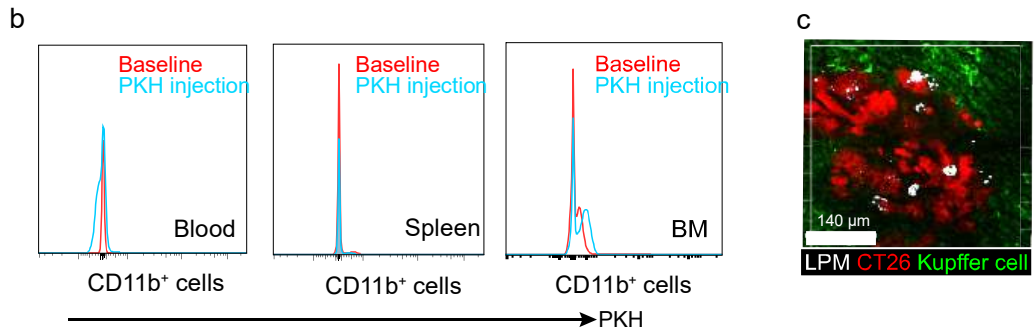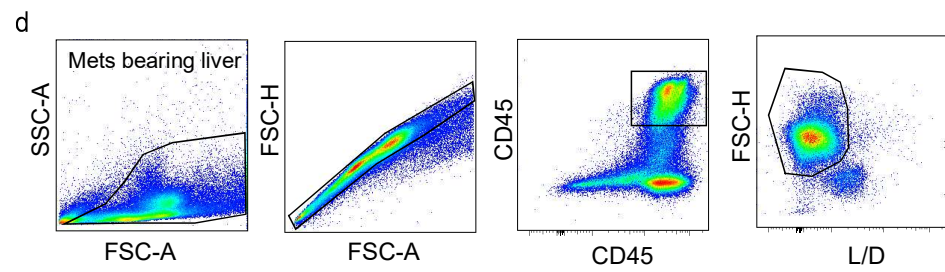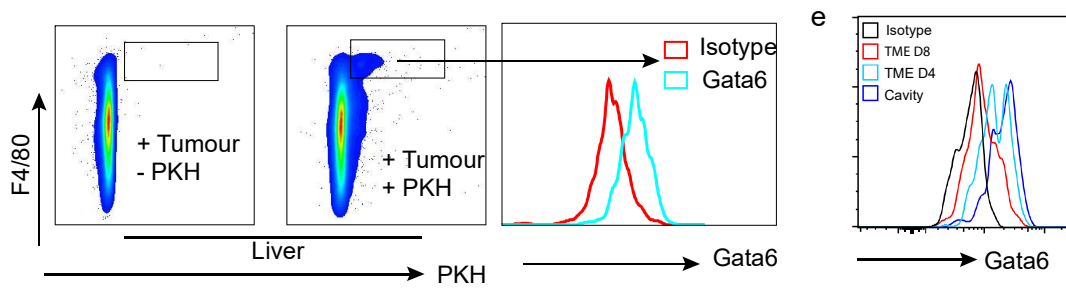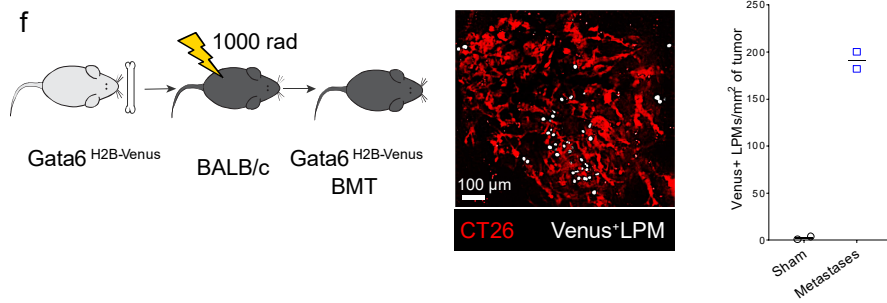

**Supplementary Figure 1. GLPMs in CT26 liver metastases.** **a** Representative flow cytometry plots showing specific PKH labeling of GLPMs, and **b** leaving myeloid cells of blood, spleen and bone marrow origin unstained (bottom row). **c** Stitched intravital image (scale bar = 140  $\mu$ m) showing PKH<sup>+</sup> GLPMs (white) in CT26 liver metastasis (red). Kupffer cells (bright green) around the metastasis are not labeled with PKH. **d** Representative flow cytometry plots showing gating strategy for identifying GLPMs from the metastases bearing livers where PKH<sup>+</sup> macrophages in the TME express GLPM-specific transcription factor Gata6. **e** Representative histogram plot of Gata6 expression of GLPMs from the peritoneal cavity or GLPMs in the TME at 4 and 8 days after tumor cell inoculation (n = 3; from one independent experiment). **f** Generation of Gata6<sup>H2B-Venus</sup> reporter mice following irradiation and bone marrow transfer into BALB/c mice (left), representative images of the Gata6<sup>H2B-Venus</sup> GLPMs (white) following CT26 liver metastases (red) (middle), and quantification of GLPMs on CT26 liver metastases (right; n = 2 per group), data is presented as mean.

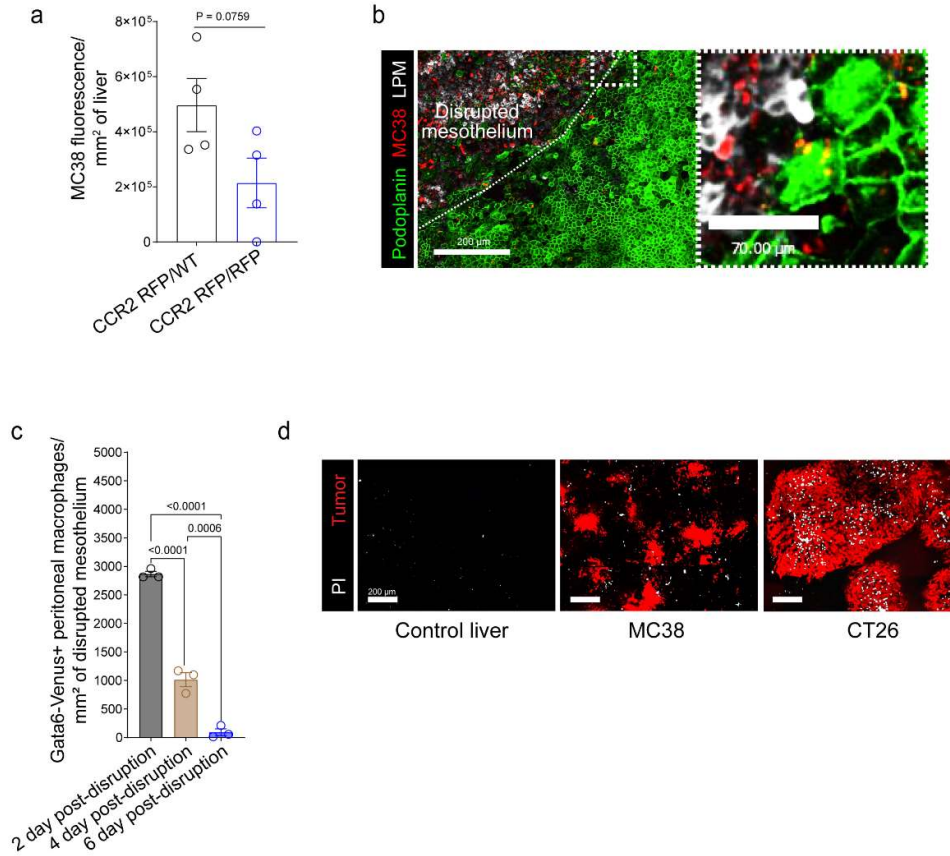

**Supplementary Figure 2. Mesothelium disruption is required for GLPM recruitment to liver metastases.** **a** Quantification of MC38 fluorescence per mm<sup>2</sup> of liver (n = 4 per group), *P* values were calculated using two-tailed unpaired t-test, *P* = 0.0759. **b** Intravital image (left; scale bar = 200 μm) and a magnified image of the selected area (right; scale bar = 70 μm) showing GLPM (white) recruitment in MC38 metastases (red) bearing liver where the mesothelium (podoplanin; green) is mechanically disrupted. **c** Quantification of Gata6-Venus<sup>+</sup> peritoneal macrophage on the disrupted mesothelium at 2-, 4- and 6-days post-disruption (n = 3 per group) *P* values were calculated using an Ordinary one-way ANOVA with Tukey's multiple comparisons test, *P* < 0.0001 2 day vs 4 day or 6 day post-disruption, *P* = 0.0006 4 day vs 6 day post-disruption. **d** Representative intravital images (scale bar = 200 μm) showing PI<sup>+</sup> cells (white) in control liver, MC38 metastases (red) or CT26 metastases (red) bearing liver (n = 3; from one independent experiment). All graphs are presented as mean ± SEM.

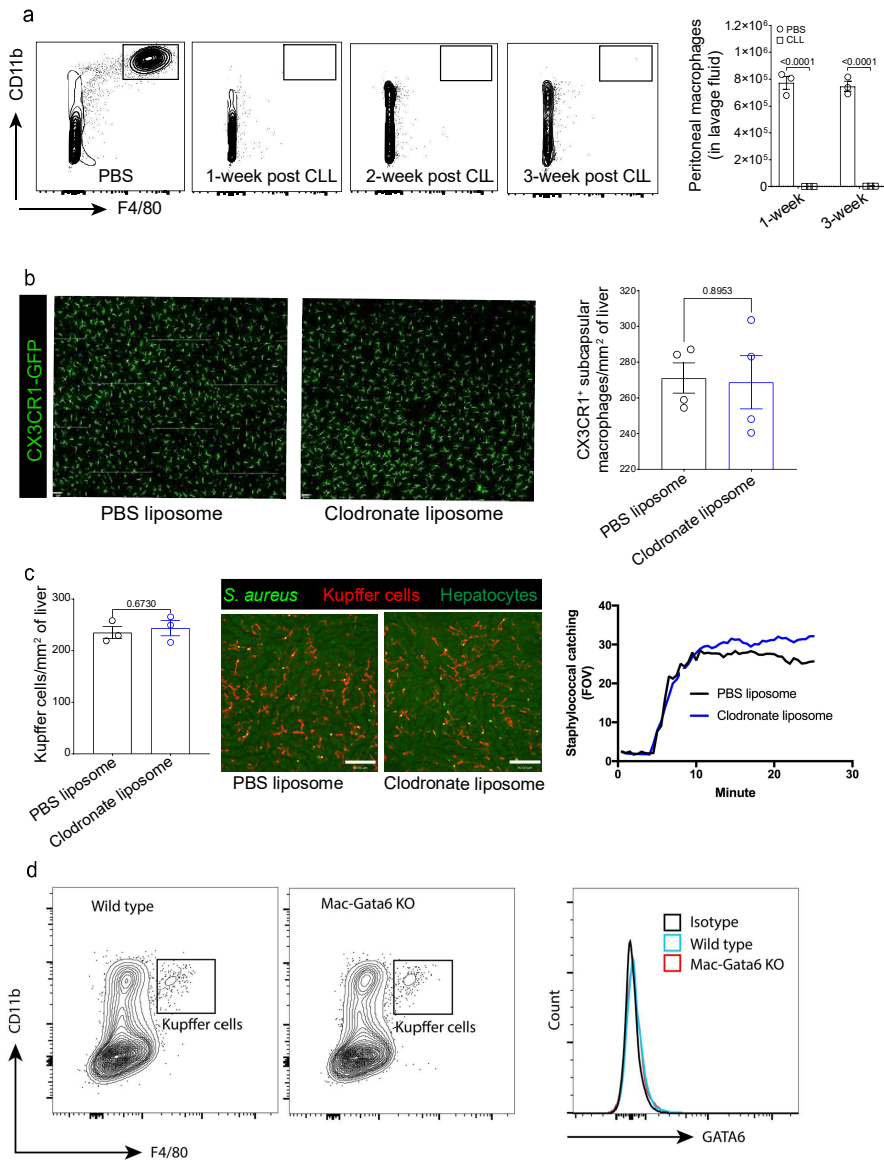

**Supplementary Figure 3. Liver macrophage populations are not altered at 7-days after Clodronate loaded liposomes treatment.** **a** Representative flow cytometry plots (left) and quantification (right) showing efficacy of peritoneal macrophage depletion following 50  $\mu$ l of CLL over 3 weeks (n = 3 per group), *P* values were calculated using an Ordinary two-way ANOVA with Bonferroni's multiple comparisons test,  $P < 0.0001$  PBS vs CLL. **b** Representative intravital images (left) and quantification (right) of CX3CR1-GFP macrophages (green) following PBS liposome or CLL treatment (n = 4 per group) *P* values

were calculated using two-tailed unpaired t-test,  $P = 0.8953$ . **c** Quantification of Kupffer cells in the liver after PBS liposome or CLL treatment ( $n = 3$  per group)  $P$  values were calculated using two-tailed unpaired t-test,  $P = 0.6730$  (left) and representative intravital images (middle) and quantification (right) of Kupffer cell (red) catching of *S. aureus* (bright green) following PBS liposome or CLL treatment. **d** Representative flow cytometry plots and histogram showing lack of Gata6 expression in Kupffer cells in both WT and Mac-Gata6 KO mice ( $n = 3$ ; from one independent experiment). All graphs are presented as mean  $\pm$  SEM.



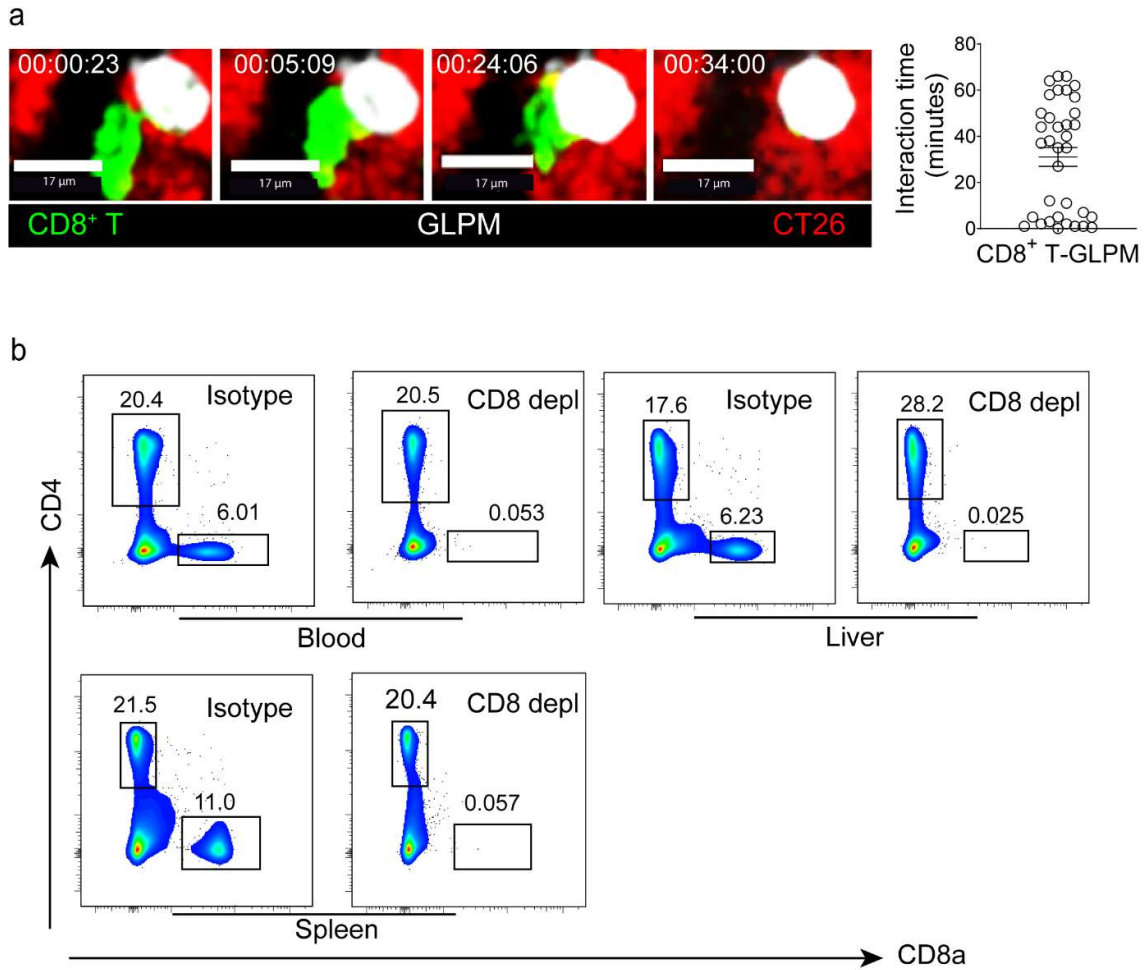

**Supplementary Figure 4. CD8<sup>+</sup> T cell role in liver metastases.** **a** Time-lapse intravital images (left; scale bar = 17 μm) showing interaction between a GLPM (white) and a CD8<sup>+</sup> T cell (green) within CT26 metastasis (red) and the quantification (right) of the interaction time between GLPMs and CD8<sup>+</sup> T cells within the TME (each point indicates an interaction; n=3). **b** Representative flow cytometry plots showing efficiency of CD8<sup>+</sup> T cell depletion in the blood, liver and spleen following intraperitoneal administration of anti-CD8α (clone: 2.43; Bio X Cell) antibody (n = 5; from one independent experiment). All graphs are presented as mean ± SEM.

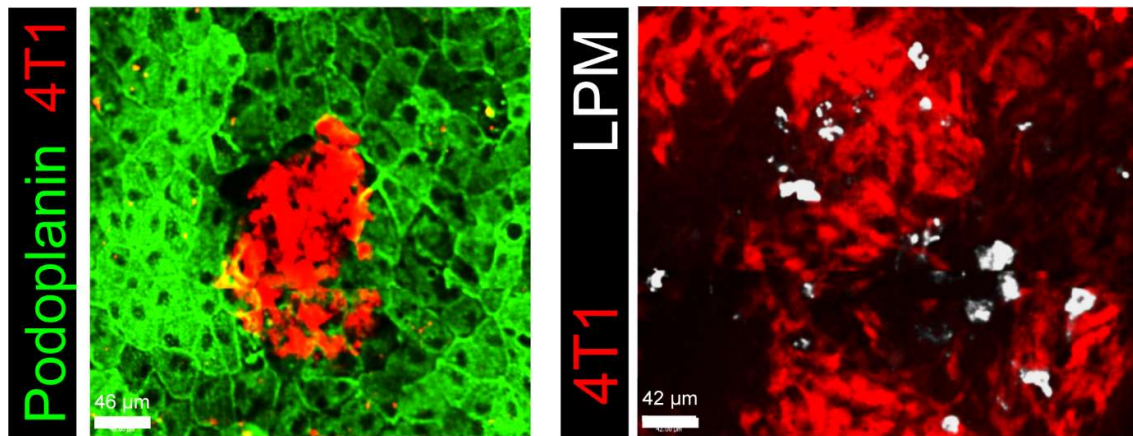

**Supplementary Figure 5. Mesothelial damage and GLPM recruitment in 4T1 liver metastasis.** Representative confocal images (left; scale bar = 46  $\mu\text{m}$ ) displaying the mesothelium (green) and 4T1 metastasis (red) bearing liver and (right; scale bar = 42  $\mu\text{m}$ ) PKH<sup>+</sup> GLPMs (white) in 4T1 metastasis (red).

**Supplementary Table 1.** Table of all antibodies used for flow cytometry.

| <b>Fluorophore</b> | <b>Antibody</b>                     | <b>Clone</b>    | <b>Supplier</b>   | <b>cat no</b>      | <b>lot no</b> | <b>dilution</b> |
|--------------------|-------------------------------------|-----------------|-------------------|--------------------|---------------|-----------------|
| AF647              | Hamster<br>anti-mouse<br>podoplanin | eBio8.1.1       | eBioscience       | 53-<br>5381-<br>82 | B334381       | 1:100           |
| AF647              | Rat anti-<br>mouse<br>CD8b          | Ly-3            | Biologend         | 126612             | B204556       | 1:100           |
| APC                | Rat anti-<br>mouse PD-<br>1         | 29F.1A12        | Biologend         | 135209             | B220226<br>4  | 1:100           |
| APC                | Rat IgG2a<br>(isotype<br>control)   | RTK2758         | Biologend         | 400511             | B207074       | 1:100           |
| APC                | Rat anti-<br>mouse<br>MHCII         | M5/114.15.<br>2 | BD<br>Biosciences | 562367             | 8310917       | 1:100           |
| APC Cy7            | Rat anti-<br>mouse<br>F4/80         | BM8             | eBioscience       | 47-<br>4801-<br>82 | 2086942       | 1:100           |
| BV510              | Rat anti-<br>mouse<br>CD45          | 30-F11          | Biologend         | 103138             | B346257       | 1:100           |

|              |                             |             |                |            |          |       |
|--------------|-----------------------------|-------------|----------------|------------|----------|-------|
| BV605        | Rat anti-mouse CD102        | 3C4(m1c2/4) | BD Biosciences | 740346     | 233587   | 1:100 |
| eFluor450    | Hamster anti-mouse CD3      | 145-2C11    | ThermoFisher   | 48-0031-82 | 1993648  | 1:100 |
| eFluor450    | Anti-mouse F4/80            | BM8         | eBioscience    | 48-4801-80 | 1974936  | 1:100 |
| FITC         | Rat anti-mouse F4/80        | BM8         | eBioscience    | 11-4801-85 | 2B330107 | 1:100 |
| Pacific blue | Rat anti-mouse Ly6G         | 1A8         | Biolegend      | 127612     | B336505  | 1:100 |
| PE           | Rat anti-mouse CD8b         | YTS156.7.7  | Biolegend      | 126608     |          | 1:100 |
| PE           | Rat anti-mouse PD-L1        | 10F9G2      | Biolegend      | 124307     |          | 1:100 |
| PE           | Rat IgG2b (Isotype control) | RTK4530     | Biolegend      | 400607     |          | 1:100 |

|              |                         |         |               |            |             |        |
|--------------|-------------------------|---------|---------------|------------|-------------|--------|
| PerCp Cy5.5  | Rat anti-mouse Ly6C     | HK1.4   | Biolegend     | 128012     | B338815     | 1:100  |
| PE Cy7       | Rat anti-mouse CD11b    | M1/70   | ThermoFisher  | 25-0112-82 | 2394478     | 1:100  |
| PE           | Rat anti-mouse CD4      | RM4-5   | eBioscience   | 12-0043082 | E01014-1633 | 1:100  |
| FITC         | Rat anti-mouse CD8      | 53-6.7  | eBioscience   | 11-0081-85 | 2202710     | 1:100  |
| FITC         | Hamster anti-mouse CD80 | 16-10A1 | BD Pharmingen | 553768     | 7493        | 1:100  |
| Unconjugated | Rat anti-mouse CD16/32  | BE307   | BioXcell      | BE0307     |             | 1:4000 |
