# Supplementary material for: Gata6+ resident peritoneal macrophages promote the growth of liver metastasis
Source: PubMed Central journal article supplement (PMC9338095; doi:10.1038/s41467-022-32080-y), 2022-07-29
Supplement: 41467_2022_32080_MOESM6_ESM.pdf [file 41467_2022_32080_MOESM6_ESM.pdf]

## Reporting Summary

Nature Research wishes to improve the reproducibility of the work that we publish. This form provides structure for consistency and transparency in reporting. For further information on Nature Research policies, see our [Editorial Policies](#) and the [Editorial Policy Checklist](#).

### Statistics

For all statistical analyses, confirm that the following items are present in the figure legend, table legend, main text, or Methods section.

n/a Confirmed

- |                                     |                                     |                                                                                                                                                                                                                                                            |
|-------------------------------------|-------------------------------------|------------------------------------------------------------------------------------------------------------------------------------------------------------------------------------------------------------------------------------------------------------|
| <input type="checkbox"/>            | <input checked="" type="checkbox"/> | The exact sample size ( $n$ ) for each experimental group/condition, given as a discrete number and unit of measurement                                                                                                                                    |
| <input type="checkbox"/>            | <input checked="" type="checkbox"/> | A statement on whether measurements were taken from distinct samples or whether the same sample was measured repeatedly                                                                                                                                    |
| <input type="checkbox"/>            | <input checked="" type="checkbox"/> | The statistical test(s) used AND whether they are one- or two-sided<br><i>Only common tests should be described solely by name; describe more complex techniques in the Methods section.</i>                                                               |
| <input checked="" type="checkbox"/> | <input type="checkbox"/>            | A description of all covariates tested                                                                                                                                                                                                                     |
| <input checked="" type="checkbox"/> | <input type="checkbox"/>            | A description of any assumptions or corrections, such as tests of normality and adjustment for multiple comparisons                                                                                                                                        |
| <input type="checkbox"/>            | <input checked="" type="checkbox"/> | A full description of the statistical parameters including central tendency (e.g. means) or other basic estimates (e.g. regression coefficient) AND variation (e.g. standard deviation) or associated estimates of uncertainty (e.g. confidence intervals) |
| <input type="checkbox"/>            | <input checked="" type="checkbox"/> | For null hypothesis testing, the test statistic (e.g. $F$ , $t$ , $r$ ) with confidence intervals, effect sizes, degrees of freedom and $P$ value noted<br><i>Give <math>P</math> values as exact values whenever suitable.</i>                            |
| <input checked="" type="checkbox"/> | <input type="checkbox"/>            | For Bayesian analysis, information on the choice of priors and Markov chain Monte Carlo settings                                                                                                                                                           |
| <input checked="" type="checkbox"/> | <input type="checkbox"/>            | For hierarchical and complex designs, identification of the appropriate level for tests and full reporting of outcomes                                                                                                                                     |
| <input checked="" type="checkbox"/> | <input type="checkbox"/>            | Estimates of effect sizes (e.g. Cohen's $d$ , Pearson's $r$ ), indicating how they were calculated                                                                                                                                                         |

*Our web collection on [statistics for biologists](#) contains articles on many of the points above.*

### Software and code

Policy information about [availability of computer code](#)

Data collection

Images were acquired and quantified by Volocity software (Quorum Technologies) v6.1.1. Flow cytometry data were acquired with BD FACSDiva™ (BD Biosciences) v8.0.2

Data analysis

Flowjo (Treestar Inc) v10 was used to analyze Flow cytometry data. Statistical analysis was performed in Graphpad Prism 9 v9.0 software .

For manuscripts utilizing custom algorithms or software that are central to the research but not yet described in published literature, software must be made available to editors and reviewers. We strongly encourage code deposition in a community repository (e.g. GitHub). See the Nature Research [guidelines for submitting code & software](#) for further information.

### Data

Policy information about [availability of data](#)

All manuscripts must include a [data availability statement](#). This statement should provide the following information, where applicable:

- Accession codes, unique identifiers, or web links for publicly available datasets
- A list of figures that have associated raw data
- A description of any restrictions on data availability

All data are available within the Article Supplementary Information or Source Data file.

### Field-specific reporting

## Life sciences study design

All studies must disclose on these points even when the disclosure is negative.

|                 |                                                                                                                                                                                                                                                                                                                                                                                                                                                                                                                                                                                 |
|-----------------|---------------------------------------------------------------------------------------------------------------------------------------------------------------------------------------------------------------------------------------------------------------------------------------------------------------------------------------------------------------------------------------------------------------------------------------------------------------------------------------------------------------------------------------------------------------------------------|
| Sample size     | In most experiments sample size was determined based on previous studies within the lab using these techniques (at least three biological replicates for each group). For intravital microscopy, we were limited by imaging only one mouse at a time so a minimum of 1 experimental mouse and 1 control mouse was imaged per day. Sample size was determined based on prior studies and literature using similar experimental paradigms (Wang et al., Science, 2017; Zindel et al., Science, 2021; Neupane et al., Cell, 2020; Babes et al., Cancer Immunology Research, 2022). |
| Data exclusions | We did not exclude any data.                                                                                                                                                                                                                                                                                                                                                                                                                                                                                                                                                    |
| Replication     | Most of the experiments were repeated at least once and the results were reproducible. Data are pooled from replicated experiments.                                                                                                                                                                                                                                                                                                                                                                                                                                             |
| Randomization   | Mice were randomly selected into different treatment groups. Randomization was stratified by genotype.                                                                                                                                                                                                                                                                                                                                                                                                                                                                          |
| Blinding        | The investigators were not blinded during data acquisition because treatments and data collection were performed by the same researcher. Quantification of data did not require any interpretation or subjective judgment so blinding was not necessary.                                                                                                                                                                                                                                                                                                                        |

## Reporting for specific materials, systems and methods

We require information from authors about some types of materials, experimental systems and methods used in many studies. Here, indicate whether each material, system or method listed is relevant to your study. If you are not sure if a list item applies to your research, read the appropriate section before selecting a response.

### Materials & experimental systems

| n/a                                 | Included in the study                                           |
|-------------------------------------|-----------------------------------------------------------------|
| <input type="checkbox"/>            | <input checked="" type="checkbox"/> Antibodies                  |
| <input type="checkbox"/>            | <input checked="" type="checkbox"/> Eukaryotic cell lines       |
| <input checked="" type="checkbox"/> | <input type="checkbox"/> Palaeontology and archaeology          |
| <input type="checkbox"/>            | <input checked="" type="checkbox"/> Animals and other organisms |
| <input checked="" type="checkbox"/> | <input type="checkbox"/> Human research participants            |
| <input checked="" type="checkbox"/> | <input type="checkbox"/> Clinical data                          |
| <input checked="" type="checkbox"/> | <input type="checkbox"/> Dual use research of concern           |

### Methods

| n/a                                 | Included in the study                              |
|-------------------------------------|----------------------------------------------------|
| <input checked="" type="checkbox"/> | <input type="checkbox"/> ChIP-seq                  |
| <input type="checkbox"/>            | <input checked="" type="checkbox"/> Flow cytometry |
| <input checked="" type="checkbox"/> | <input type="checkbox"/> MRI-based neuroimaging    |

## Antibodies

Antibodies used

Fluorophore/antibody / clone / supplier name / catalog # / lot #/ dilution  
 AF488 / Hamster anti-mouse podoplanin / eBio8.1.1 / eBioscience / Cat# 53-5381-82 / B334381 / 1:100  
 AF647 / goat anti-rabbit IgG / polyclonal / Life Technologies / Cat# A21244 / 2390713 / 1:100  
 AF647 / rat anti-mouse CD8b / Ly-3 / Biolegend / Cat# 126612 / B204556 /1:100  
 APC / rat anti-mouse PD-1 / 29F.1A12 / Biolegend / Cat# 135209 / B202264 / 1:100  
 APC / Rat IgG2a (Isotype control) / RTK2758 / Biolegend / Cat# 400511 / B207074 / 1:100  
 AAPC / rat anti-mouse MHCII / M5/114.15.2 / BD Biosciences / Cat# 562367 / 8310917 / 1:100  
 APC-Cy7 / rat anti-mouse F4/80 / BM8 / eBioscience / Cat# 47-4801-82 / 2086942 /1:100  
 BV510 / rat anti-mouse CD45 / 30-F11 / Biolegend / Cat# 103138 / B346257 /1:100  
 BV605 / rat anti-mouse CD102 / 3C4(m1c2/4) / BD Biosciences / Cat# 740346 / 233587 /1:100  
 eFluor450 / hamster anti-mouse CD3 / 145-2C11 / ThermoFisher / Cat# 48-0031-82 / 1993648 /1:100  
 eFluor450 / anti-mouse F4/80 / BM8 / eBioscience / Cat# 48-4801-80 / 1974936 /1:100  
 FITC / rat anti-mouse F4/80 / BM8 / eBioscience / Cat#11-4801-85 / 2B330107 /1:100  
 Pacific Blue / rat anti-mouse Ly6G / 1A8 / Biolegend / Cat# 127612 / B336505 /1:100  
 PE / rat anti-mouse CD8 / YTS156.7.7 / Biolegend / Cat# 126608 / 1:100  
 PE / rat anti-mouse PD-L1 / 10F.9G2 / Biolegend / Cat# 124307 / 1:100  
 PE / Rat IgG2b (isotype control) / RTK4530 / Biolegend / Cat# 400607 / 1:100  
 PerCP-Cy5.5 / rat anti-mouse Ly6C / HK1.4 / Biolegend / Cat# 128012 / B338815 / 1:100  
 PE-Cy7 / rat anti-mouse CD11b / M1/70 / ThermoFisher / Cat# 25-0112-82 / 2394478 / 1:100  
 PE / rat anti-mouse CD4 / RM4-5 / eBioscience / Cat# 12-0043-82 / E01014-1633 / 1:100  
 FITC / rat anti-mouse CD8 / 53-6.7 / eBioscience / Cat# 11-0081-85 / 2002710 / 1:100  
 FITC / hamster anti-mouse CD80 / 16-10A1 / Pharmingen / Cat# 553768/ 7493 /1:100  
 Unconjugated / rabbit anti-human Gata6 / D61E4 / Cell Signaling / Cat# 5851  
 Unconjugated / rabbit IgG (Isotype control) / DA1E / Cell Signaling / Cat#3900S  
 Unconjugated / rat anti-mouse CD16/32 / BE0307 / BioXcell / Cat# BE0307 / 1:4000  
 Unconjugated / rat anti-mouse PD-L1 / 10F.9G2 / BioXcell / Cat# BE0101 / 10 mg/kg

- CD16/CD32 functional blocking antibody has been reported to block Fc receptors in vitro and in vivo. Ab validation at <https://d2a7cdyquyl45u.cloudfront.net/tds-sheets/BE0307-tds.pdf>

- PD-L1 functional blocking antibody has been reported to block PD-L1 in numerous published articles. Validation at <https://d2a7cdyquyl45u.cloudfront.net/tds-sheets/BE0101-tds.pdf>

- CD8 unconjugated (depleting) antibody has been reported to deplete CD8 T cells and the supporting data is presented in Supplementary Figure 3.

- For all the antibodies used to stain specific cell markers, a positive and negative counter-stain was defined to identify signal to background ratio at concentrations ranging from 1:100 to 1:1000.

Fluorophore/antibody / clone / supplier name / catalog # / validation statement

AF488 / Hamster anti-mouse podoplanin / eBio8.1.1 / eBioscience / Cat# 53-5381-82 / [https://www.thermofisher.com/order/genome-database/dataSheetPdf?producttype=antibody&productssubtype=antibody\\_primary&productId=53-5381-82&version=233](https://www.thermofisher.com/order/genome-database/dataSheetPdf?producttype=antibody&productssubtype=antibody_primary&productId=53-5381-82&version=233)

AF647 / goat anti-rabbit IgG / polyclonal / Life Technologies / Cat# A21244 / [https://www.thermofisher.com/order/genome-database/dataSheetPdf?producttype=antibody&productssubtype=antibody\\_secondary&productId=A-21244&version=233](https://www.thermofisher.com/order/genome-database/dataSheetPdf?producttype=antibody&productssubtype=antibody_secondary&productId=A-21244&version=233)

AF647 / rat anti-mouse CD8b / Ly-3 / Biolegend / Cat# 126612 / <https://www.biolegend.com/en-us/search-results/alexa-fluor-647-anti-mouse-cd8b-antibody-4478?pdf=true&displayInline=true&leftRightMargin=15&topBottomMargin=15&filename=Alexa%20Fluor%20AE%20647%20anti-mouse%20CD8b%20Antibody.pdf>

APC / rat anti-mouse PD-1 / 29F.1A12 / Biolegend / Cat# 135209 / [https://www.biolegend.com/fr-lu/products/apc-anti-mouse-cd279-pd-1-antibody-6497?pdf=true&displayInline=true&leftRightMargin=15&topBottomMargin=15&filename=APC%20anti-mouse%20CD279%20\(PD-1\)%20Antibody.pdf](https://www.biolegend.com/fr-lu/products/apc-anti-mouse-cd279-pd-1-antibody-6497?pdf=true&displayInline=true&leftRightMargin=15&topBottomMargin=15&filename=APC%20anti-mouse%20CD279%20(PD-1)%20Antibody.pdf)

APC / Rat IgG2a (Isotype control) / RTK2758 / Biolegend / Cat# 400511 / <https://www.biolegend.com/it-it/products/apc-rat-igg2a-kappa-isotype-ctrl-1838?pdf=true&displayInline=true&leftRightMargin=15&topBottomMargin=15&filename=APC%20Rat%20IgG2a,%20%20CE%BA%20Isotype%20Ctrl%20Antibody.pdf>

APC / rat anti-mouse MHCII / M5/114.15.2 / BD Biosciences / Cat# 562367 / 8310917 / <https://www.bdbiosciences.com/content/bdb/paths/generate-tds-document.ca.562367.pdf>

APC-Cy7 / rat anti-mouse F4/80 / BM8 / eBioscience / Cat# 47-4801-82 / [https://www.thermofisher.com/order/genome-database/dataSheetPdf?producttype=antibody&productssubtype=antibody\\_primary&productId=47-4801-82&version=233](https://www.thermofisher.com/order/genome-database/dataSheetPdf?producttype=antibody&productssubtype=antibody_primary&productId=47-4801-82&version=233)

BV510 / rat anti-mouse CD45 / 30-F11 / Biolegend / Cat# 103138 / <https://www.biolegend.com/en-us/products/brilliant-violet-510-anti-mouse-cd45-antibody-7995?pdf=true&displayInline=true&leftRightMargin=15&topBottomMargin=15&filename=Brilliant%20Violet%20510%E2%84%A2%20anti-mouse%20CD45%20Antibody.pdf>

BV605 / rat anti-mouse CD102 / 3C4(m1c2/4) / BD Biosciences / Cat# 740346 / <https://www.bdbiosciences.com/content/bdb/paths/generate-tds-document.us..pdf>

eFluor450 / hamster anti-mouse CD3 / 145-2C11 / ThermoFisher / Cat# 48-0031-82 / [https://www.thermofisher.com/order/genome-database/dataSheetPdf?producttype=antibody&productssubtype=antibody\\_primary&productId=48-0031-82&version=233](https://www.thermofisher.com/order/genome-database/dataSheetPdf?producttype=antibody&productssubtype=antibody_primary&productId=48-0031-82&version=233)

eFluor450 / anti-mouse F4/80 / BM8 / eBioscience / Cat# 48-4801-80 / [https://www.thermofisher.com/order/genome-database/dataSheetPdf?producttype=antibody&productssubtype=antibody\\_primary&productId=48-4801-82&version=233](https://www.thermofisher.com/order/genome-database/dataSheetPdf?producttype=antibody&productssubtype=antibody_primary&productId=48-4801-82&version=233)

FITC / rat anti-mouse F4/80 / BM8 / eBioscience / Cat#11-4801-85 / [https://www.thermofisher.com/order/genome-database/dataSheetPdf?producttype=antibody&productssubtype=antibody\\_primary&productId=11-4801-82&version=233](https://www.thermofisher.com/order/genome-database/dataSheetPdf?producttype=antibody&productssubtype=antibody_primary&productId=11-4801-82&version=233)

Pacific Blue / rat anti-mouse Ly6G / 1A8 / Biolegend / Cat# 127612 / <https://www.biolegend.com/nl-nl/search-results/pacific-blue-anti-mouse-ly-6g-antibody-6082?pdf=true&displayInline=true&leftRightMargin=15&topBottomMargin=15&filename=Pacific%20Blue%E2%84%A2%20anti-mouse%20Ly-6G%20Antibody.pdf>

PE / rat anti-mouse CD8 / YTS156.7.7 / Biolegend / Cat# 126608 / <https://www.biolegend.com/fr-ch/products/pe-anti-mouse-cd8b-antibody-4476?pdf=true&displayInline=true&leftRightMargin=15&topBottomMargin=15&filename=PE%20anti-mouse%20CD8b%20Antibody.pdf>

PE / rat anti-mouse PD-L1 / 10F.9G2 / Biolegend / Cat# 124307 / [https://www.biolegend.com/fr-ch/products/pe-anti-mouse-cd274-b7-h1-pd-l1-antibody-4497?pdf=true&displayInline=true&leftRightMargin=15&topBottomMargin=15&filename=PE%20anti-mouse%20CD274%20\(B7-H1,%20PD-L1\)%20Antibody.pdf](https://www.biolegend.com/fr-ch/products/pe-anti-mouse-cd274-b7-h1-pd-l1-antibody-4497?pdf=true&displayInline=true&leftRightMargin=15&topBottomMargin=15&filename=PE%20anti-mouse%20CD274%20(B7-H1,%20PD-L1)%20Antibody.pdf)

PE / Rat IgG2b (isotype control) / RTK4530 / Biolegend / Cat# 400607 / <https://www.biolegend.com/fr-ch/products/pe-rat-igg2b-kappa-isotype-ctrl-1856?pdf=true&displayInline=true&leftRightMargin=15&topBottomMargin=15&filename=PE%20Rat%20IgG2b,%20%20CE%BA%20Isotype%20Ctrl%20Antibody.pdf>

PerCP-Cy5.5 / rat anti-mouse Ly6C / HK1.4 / Biolegend / Cat# 128012 / <https://www.biolegend.com/ja-jp/products/percp-cyanine5-5-cyanine5-5-anti-mouse-ly-6c-antibody-5967?pdf=true&displayInline=true&leftRightMargin=15&topBottomMargin=15&filename=PerCP/Cyanine5.5%20anti-mouse%20Ly-6C%20Antibody.pdf>

PE-Cy7 / rat anti-mouse CD11b / M1/70 / ThermoFisher / Cat# 25-0112-82 / [https://www.thermofisher.com/order/genome-database/dataSheetPdf?producttype=antibody&productssubtype=antibody\\_primary&productId=25-0112-82&version=233](https://www.thermofisher.com/order/genome-database/dataSheetPdf?producttype=antibody&productssubtype=antibody_primary&productId=25-0112-82&version=233)

PE / rat anti-mouse CD4 / RM4-5 / eBioscience / Cat# 12-0043-82 / [https://www.thermofisher.com/document-connect/document-connect.html?url=https://assets.thermofisher.com/TFS-Assets%2FCertificate%2FCBD%2FCOA%2FCOA\\_12-0043-82\\_2345064\\_1.pdf](https://www.thermofisher.com/document-connect/document-connect.html?url=https://assets.thermofisher.com/TFS-Assets%2FCertificate%2FCBD%2FCOA%2FCOA_12-0043-82_2345064_1.pdf)

FITC / rat anti-mouse CD8 / 53-6.7 / eBioscience / Cat# 11-0081-85 / [https://www.thermofisher.com/order/genome-database/dataSheetPdf?producttype=antibody&productssubtype=antibody\\_primary&productId=11-0081-82&version=233](https://www.thermofisher.com/order/genome-database/dataSheetPdf?producttype=antibody&productssubtype=antibody_primary&productId=11-0081-82&version=233)

FITC / hamster anti-mouse CD80 / 16-10A1 / BD Pharmingen / Cat# 553768 / <https://www.bdbiosciences.com/content/bdb/paths/generate-tds-document.ca.553768.pdf>

Unconjugated / rabbit anti-human Gata6 / D61E4 / Cell Signaling / Cat# 5851 / <https://www.cellsignal.com/datasheet.jsp?productId=5851&images=1&size=A4>

Unconjugated / rabbit IgG (Isotype control) / DA1E / Cell Signaling / Cat#3900S / <https://www.cellsignal.com/datasheet.jsp?productId=3900&images=1&size=A4>

Unconjugated / rat anti-mouse CD16/32 / BE0307 / BioXcell / Cat# BE0307 / <https://d2a7cdyquyl45u.cloudfront.net/tds-sheets/BE0307-tds.pdf>

Unconjugated / rat anti-mouse PD-L1 / 10F.9G2 / BioXcell / Cat# BE0101 / <https://d2a7cdyquyl45u.cloudfront.net/tds-sheets/BE0101-tds.pdf>

Unconjugated / rat anti-mouse CD8 / BE0061 / BioXcell / Cat# BE0061 / <https://d2a7cdyquyl45u.cloudfront.net/tds-sheets/BE0061->

## Eukaryotic cell lines

Policy information about [cell lines](#)

|                                                                   |                                                                                                                                                                                                                                                         |
|-------------------------------------------------------------------|---------------------------------------------------------------------------------------------------------------------------------------------------------------------------------------------------------------------------------------------------------|
| Cell line source(s)                                               | CT26 WT Cell line, ATCC (ATCC Cat# CRL-2638, RRID:CVCL_7256); MC-38 cell line Kerafast (Kerfast Cat# ENH204-FP RRID:CVCL_B288); B16-F10 cell line, ATCC (ATCC Cat# CRL-6475, RRID:CVCL_0159); 4T1 cell line, ATCC (ATCC Cat# CRL-2539, RRID:CVCL_0125). |
| Authentication                                                    | Cell lines obtained from commercial sources were cultured for a limited number of passages. The morphology and the growth pattern were strictly monitored as per manufacturers instructions.                                                            |
| Mycoplasma contamination                                          | All cell lines used in this study were tested for Mycoplasma contamination and are negative.                                                                                                                                                            |
| Commonly misidentified lines (See <a href="#">ICLAC</a> register) | No commonly misidentified cell lines were used in the study                                                                                                                                                                                             |

## Animals and other organisms

Policy information about [studies involving animals](#); [ARRIVE guidelines](#) recommended for reporting animal research

|                         |                                                                                                                                                                                                                                                                                                                                                                                                                                                                                                                                                                                                                                                                                                                                                                                                                                                                                                                                                                                                                                                                                                                                                                                                                                                                                                                                                                                                                                                                                                                   |
|-------------------------|-------------------------------------------------------------------------------------------------------------------------------------------------------------------------------------------------------------------------------------------------------------------------------------------------------------------------------------------------------------------------------------------------------------------------------------------------------------------------------------------------------------------------------------------------------------------------------------------------------------------------------------------------------------------------------------------------------------------------------------------------------------------------------------------------------------------------------------------------------------------------------------------------------------------------------------------------------------------------------------------------------------------------------------------------------------------------------------------------------------------------------------------------------------------------------------------------------------------------------------------------------------------------------------------------------------------------------------------------------------------------------------------------------------------------------------------------------------------------------------------------------------------|
| Laboratory animals      | Animal experiments were performed with 8-12 week-old mice. C57BL/6J and BALB/c mice were purchased from the Jackson Laboratory. All mice were housed under a 12/12 light/dark cycle at 22-25°C and 30-70% humidity under specific pathogen-free conditions. Mice received sterilized rodent chow and water ad libitum. Gata6fl/fl mice were kindly provided by Dr. Medzhitov (Yale University) and bred in-house with Lyz2cre mice. Lyz2cre;Gata6fl/fl mice were subsequently bred with Gata6fl/fl to generate Cre+ (denoted as Mac-Gata6 KO) and Cre- (denoted as Mac-Gata6 WT) littermates. CCR2 KO (Ccr2Rfp/Rfp) mice were kindly provided by Richard M Ransohoff (Lerner Research Institute, Cleveland Clinic, Cleveland) and Israel F. Charo (University of California San Francisco, San Francisco). Gata6H2B-Venus reporter mice were kindly provided by Dr. Hadjantonakis (Memorial Sloan Kettering). Lyz2cre;Gata6fl/fl, Gata6fl/fl & Gata6H2B-Venus mice were back-crossed onto BALB/c background for at least 8 generations to achieve greater than 98% pure background. Single Nucleotide Polymorphisms (SNPs) testing was performed by Taqman Biosciences to confirm genetic purity. PD-L1 deficient mice were kindly provided by Dr. Arlene Sharpe (Harvard Medical School) as previously reported in Latchman, YE et al 2004, PNAS. Male and female mice were used for experiments. Mice were maintained in a specific pathogen-free facility at the University of Calgary Animal Resource Centre. |
| Wild animals            | No wild animals were used in this study                                                                                                                                                                                                                                                                                                                                                                                                                                                                                                                                                                                                                                                                                                                                                                                                                                                                                                                                                                                                                                                                                                                                                                                                                                                                                                                                                                                                                                                                           |
| Field-collected samples | No field-collected samples were included in this study                                                                                                                                                                                                                                                                                                                                                                                                                                                                                                                                                                                                                                                                                                                                                                                                                                                                                                                                                                                                                                                                                                                                                                                                                                                                                                                                                                                                                                                            |
| Ethics oversight        | All experiments involving animals were approved by the University of Calgary Animal Care Committee and were in compliance with guidelines established by the Canadian Council for Animal Care.                                                                                                                                                                                                                                                                                                                                                                                                                                                                                                                                                                                                                                                                                                                                                                                                                                                                                                                                                                                                                                                                                                                                                                                                                                                                                                                    |

Note that full information on the approval of the study protocol must also be provided in the manuscript.

## Flow Cytometry

### Plots

Confirm that:

- The axis labels state the marker and fluorochrome used (e.g. CD4-FITC).
- The axis scales are clearly visible. Include numbers along axes only for bottom left plot of group (a 'group' is an analysis of identical markers).
- All plots are contour plots with outliers or pseudocolor plots.
- A numerical value for number of cells or percentage (with statistics) is provided.

### Methodology

|                           |                                                                                                                                                                                                                                                                                                                                                                                                                                                                                                                                                                                                                                                                                                                                                      |
|---------------------------|------------------------------------------------------------------------------------------------------------------------------------------------------------------------------------------------------------------------------------------------------------------------------------------------------------------------------------------------------------------------------------------------------------------------------------------------------------------------------------------------------------------------------------------------------------------------------------------------------------------------------------------------------------------------------------------------------------------------------------------------------|
| Sample preparation        | For isolating non-parenchymal cells from normal and metastases bearing livers, livers were perfused with HBSS, minced into small pieces digested in collagenase. Single-cell suspensions were generated by mechanical disruption through a 70-µm nylon mesh (BD Bioscience). Cellular debris and hepatocytes were removed by 33% isotonic Percoll (Sigma-Aldrich). Single-cell suspensions from peritoneal cavity were collected by lavaging the peritoneal cavities with cold HBSS. Dead cells were excluded using fixable viability dye (ebioscience). Cell surface-expressed molecules were stained after CD16/32 blocking. Intracellular and nuclear staining was performed by using the Foxp3 nuclear factor staining buffer set (ebioscience). |
| Instrument                | The samples were run using a BD FACS Canto Cytometer (BD Biosciences)                                                                                                                                                                                                                                                                                                                                                                                                                                                                                                                                                                                                                                                                                |
| Software                  | BD FACS Diva software was used for the acquisition of flowcytometry data and Flowjo software was used to analyze the data.                                                                                                                                                                                                                                                                                                                                                                                                                                                                                                                                                                                                                           |
| Cell population abundance | Cell sorting was not performed                                                                                                                                                                                                                                                                                                                                                                                                                                                                                                                                                                                                                                                                                                                       |

Gating strategy

Gata6+ large peritoneal macrophages were pre-gated on singlet, live, CD45+, CD11b+ and then identified as F4/80hi and PKH26 or CD102+.

Tick this box to confirm that a figure exemplifying the gating strategy is provided in the Supplementary Information.
